# Supplementary material
Source: PubMed Central journal article supplement (PMC6660402)

## Supporting Information

### **Bulbiferates A and B: Antibacterial Acetamidohydroxybenzoates from a Marine Proteobacterium, *Microbulbifer* sp.**

Dinith R. Jayanetti,<sup>†</sup> Doug R. Braun,<sup>†</sup> Kenneth J. Barns,<sup>†</sup> Scott R. Rajski,<sup>†</sup> and Tim S. Bugni<sup>\*†</sup>

<sup>†</sup>Pharmaceutical Sciences Division, School of Pharmacy, University of Wisconsin, Madison, Wisconsin 53705,  
United States

\* To whom correspondence should be addressed. Tel.: 1-608-263-2519. E-mail:  
tim.bugni@wisc.edu.

## Supporting Information Table of Contents

| Contents                                                                                                                                   | Page |
|--------------------------------------------------------------------------------------------------------------------------------------------|------|
| 1) <b>Figure S1.</b> <sup>1</sup> H NMR spectrum of bulbiferate A ( <b>1</b> ; 600 MHz, CDCl <sub>3</sub> ).....                           | S3   |
| 2) <b>Figure S2.</b> <sup>13</sup> C NMR spectrum of bulbiferate A ( <b>1</b> ; 125 MHz, CDCl <sub>3</sub> ).....                          | S4   |
| 3) <b>Figure S3.</b> gCOSY spectrum of bulbiferate A ( <b>1</b> ; 500 MHz, CDCl <sub>3</sub> ).....                                        | S5   |
| 4) <b>Figure S4.</b> gHSQC spectrum of bulbiferate A ( <b>1</b> ; 500 MHz, CDCl <sub>3</sub> ).....                                        | S6   |
| 5) <b>Figure S5.</b> gHMBC spectrum of bulbiferate A ( <b>1</b> ; 500 MHz, CDCl <sub>3</sub> ).....                                        | S7   |
| 6) <b>Figure S6.</b> <sup>1</sup> H NMR spectrum of bulbiferate B ( <b>2</b> ; 600 MHz, CDCl <sub>3</sub> ).....                           | S8   |
| 7) <b>Figure S7.</b> <sup>13</sup> C NMR spectrum of bulbiferate B ( <b>2</b> ; 125 MHz, CDCl <sub>3</sub> ).....                          | S9   |
| 8) <b>Figure S8.</b> gCOSY spectrum of bulbiferate B ( <b>2</b> ; 500 MHz, CDCl <sub>3</sub> ).....                                        | S10  |
| 9) <b>Figure S9.</b> gHSQC spectrum of bulbiferate B ( <b>2</b> ; 500 MHz, CDCl <sub>3</sub> ).....                                        | S11  |
| 10) <b>Figure S10.</b> gHMBC spectrum of bulbiferate B ( <b>2</b> ; 500 MHz, CDCl <sub>3</sub> ).....                                      | S12  |
| 11) <b>Figure S11.</b> <sup>1</sup> H NMR spectrum of compound <b>3</b> (500 MHz, methanol- <i>d</i> <sub>4</sub> ).....                   | S13  |
| 12) <b>Figure S12.</b> <sup>13</sup> C NMR spectrum of compound <b>3</b> (125 MHz, methanol- <i>d</i> <sub>4</sub> ).....                  | S14  |
| 13) <b>Figure S13.</b> <sup>1</sup> H NMR spectrum of compound <b>4</b> (500 MHz, methanol- <i>d</i> <sub>4</sub> ).....                   | S15  |
| 14) <b>Figure S14.</b> <sup>13</sup> C NMR spectrum of compound <b>4</b> (125 MHz, methanol- <i>d</i> <sub>4</sub> ).....                  | S16  |
| 15) <b>Figure S15.</b> <sup>1</sup> H NMR spectrum of compound <b>5</b> (500 MHz, CDCl <sub>3</sub> ).....                                 | S17  |
| 16) <b>Figure S16.</b> <sup>13</sup> C NMR spectrum of compound <b>5</b> (125 MHz, CDCl <sub>3</sub> ).....                                | S18  |
| 17) <b>Figure S17.</b> ESI-MS spectrum of 4', 5'-didehydro-5'-deoxyinosine.....                                                            | S19  |
| 18) <b>Figure S18.</b> ESI-MS spectrum of 2'-O-methyladenosine.....                                                                        | S20  |
| 19) <b>Figure S19.</b> ESI-MS spectrum of 5'-methylthioadenosine.....                                                                      | S21  |
| 20) <b>Figure S20.</b> <sup>1</sup> H NMR spectrum of 4', 5'-didehydro-5'-deoxyinosine<br>(400 MHz, methanol- <i>d</i> <sub>4</sub> )..... | S22  |
| 21) <b>Figure S21.</b> <sup>1</sup> H NMR spectrum of 2'-O-methyladenosine<br>(400 MHz, methanol- <i>d</i> <sub>4</sub> ).....             | S23  |
| 22) <b>Figure S22.</b> <sup>1</sup> H NMR spectrum of 5'-methylthioadenosine<br>(400 MHz, methanol- <i>d</i> <sub>4</sub> ).....           | S24  |

**Figure S1.**  $^1\text{H}$  NMR spectrum of bulbiferate A (**1**; 600 MHz,  $\text{CDCl}_3$ )

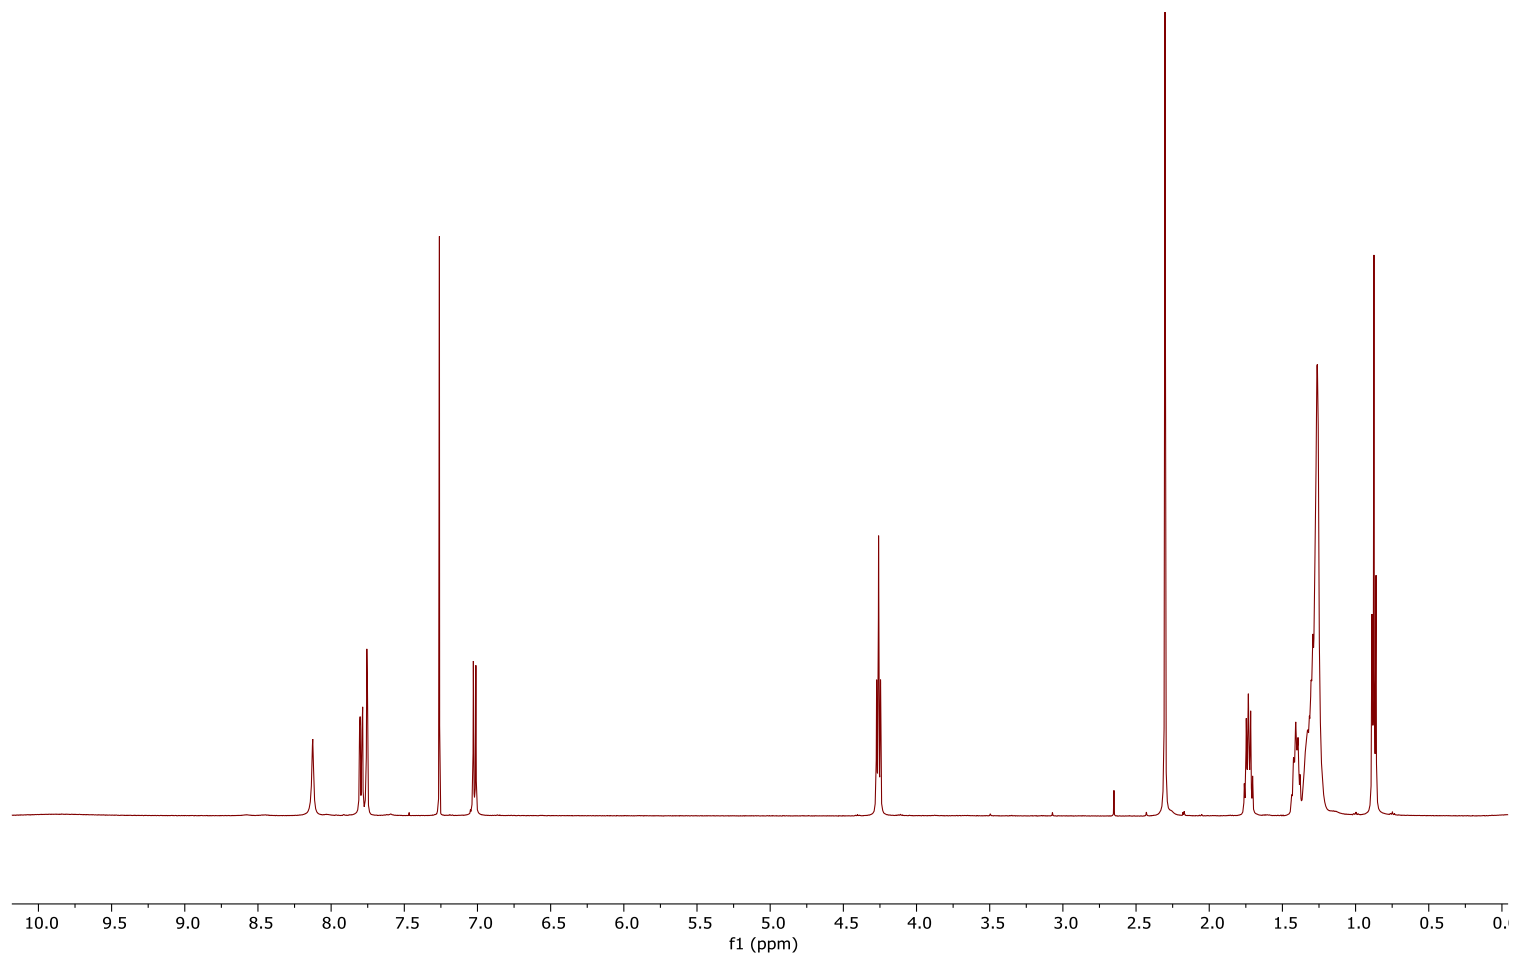

**Figure S2.**  $^{13}\text{C}$  NMR spectrum of bulbiferate A (**1**; 125 MHz,  $\text{CDCl}_3$ )

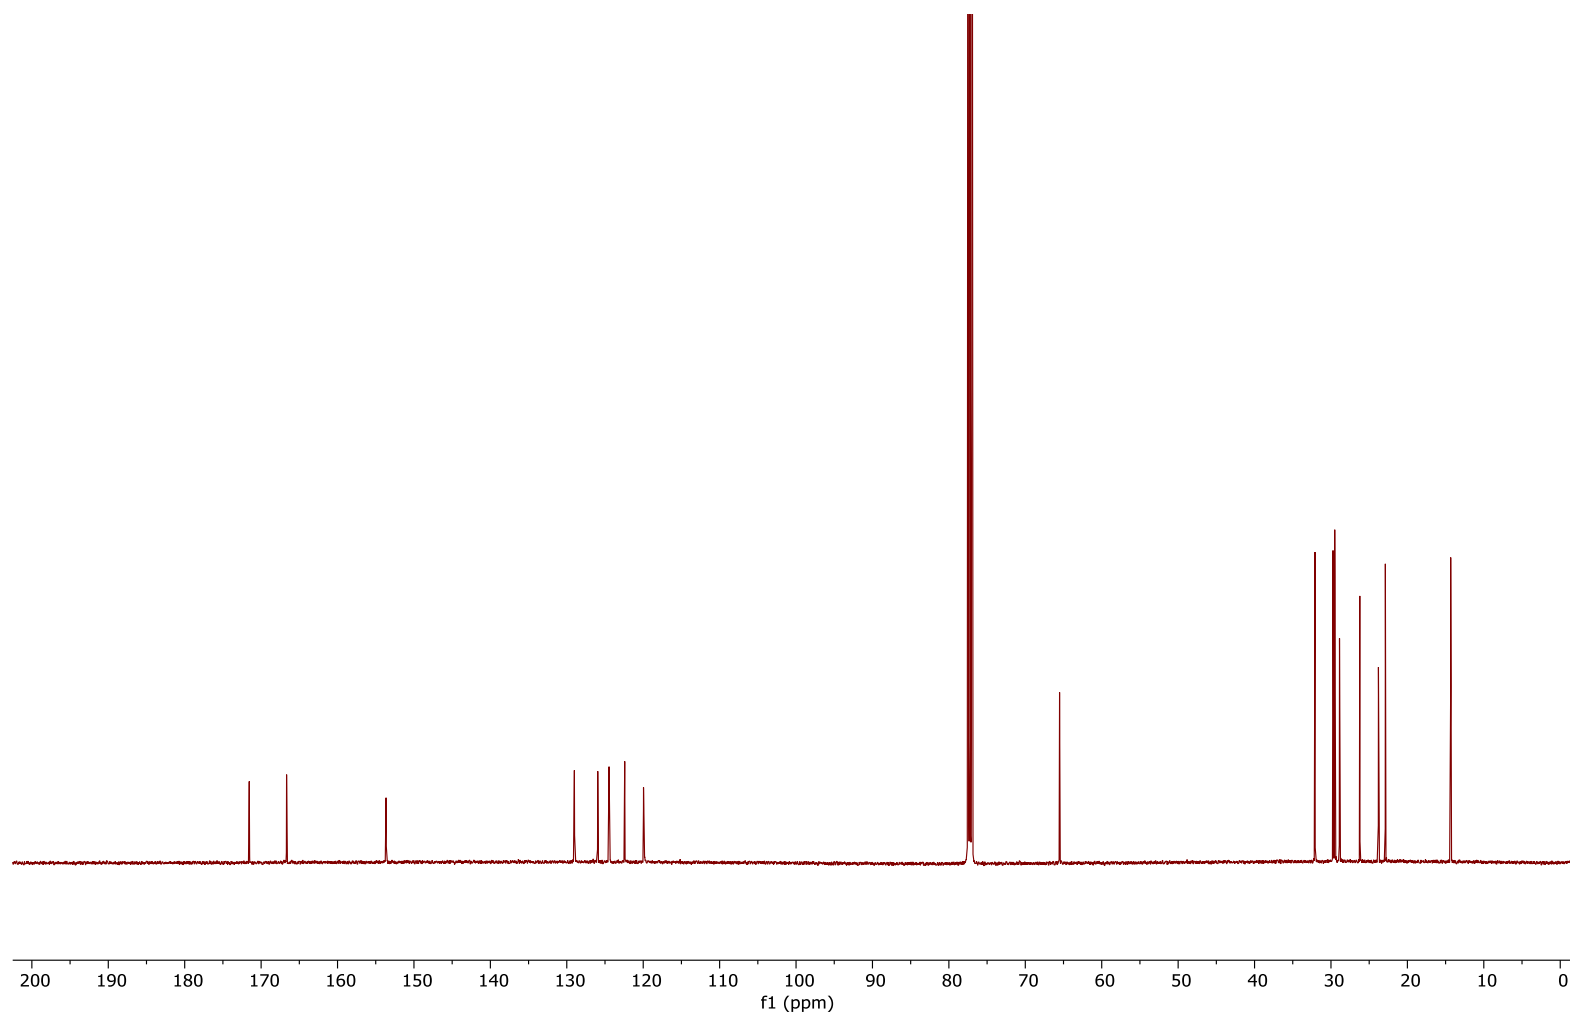

**Figure S3.** gCOSY spectrum of bulbiferate A (**1**; 500 MHz, CDCl<sub>3</sub>)

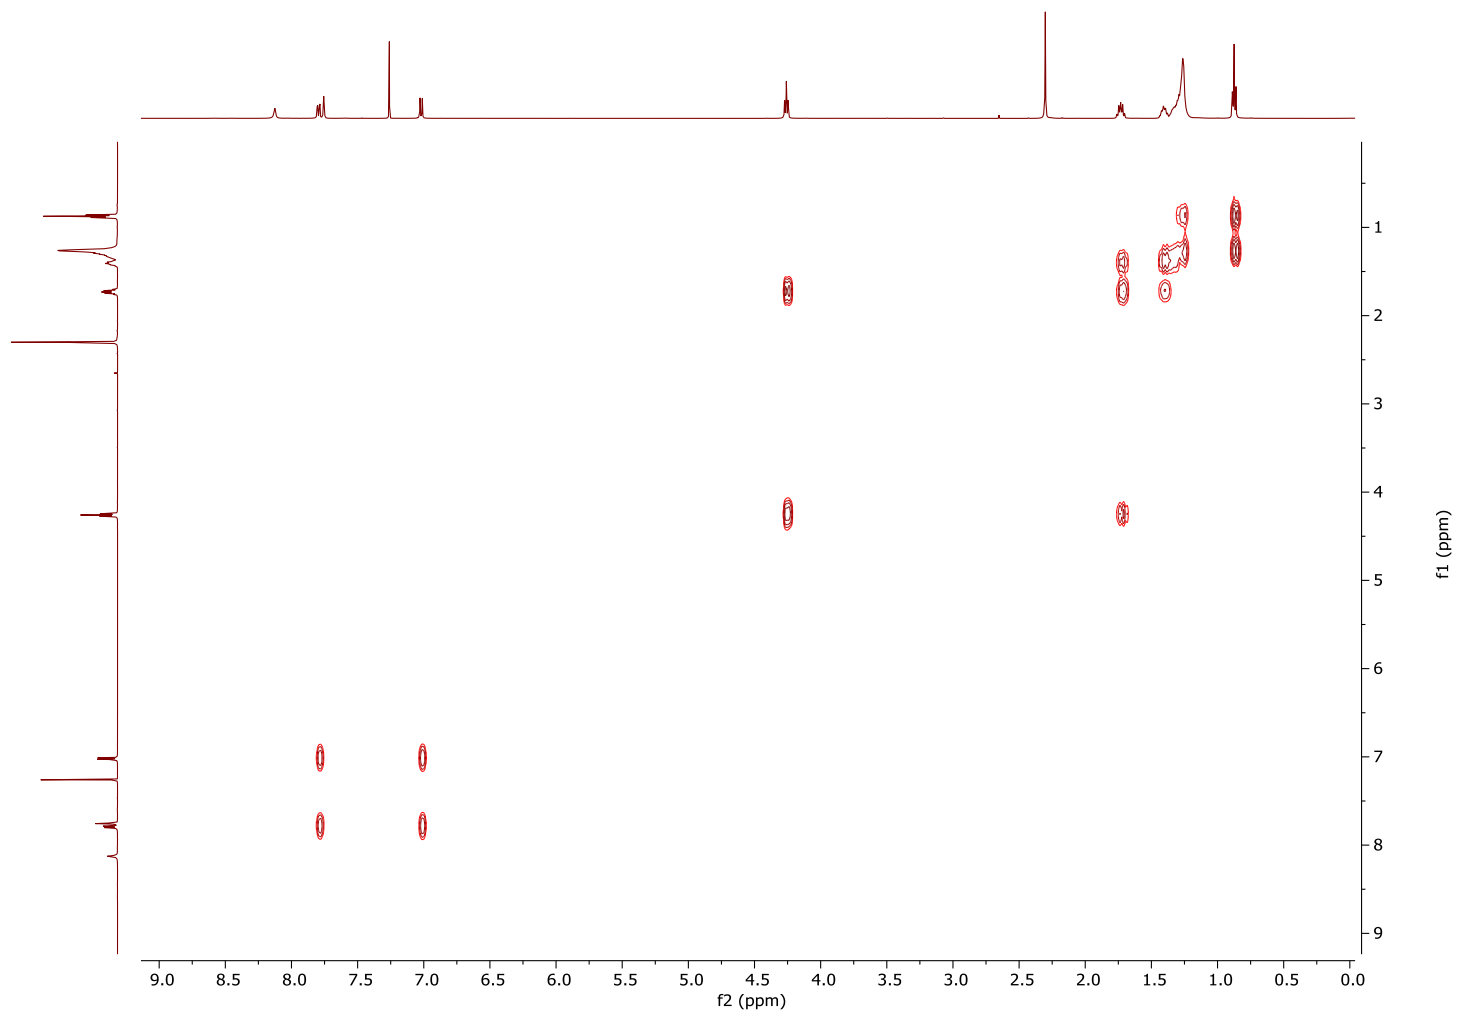

**Figure S4.** gHSQC spectrum of bulbiferate A (**1**; 500 MHz, CDCl<sub>3</sub>)

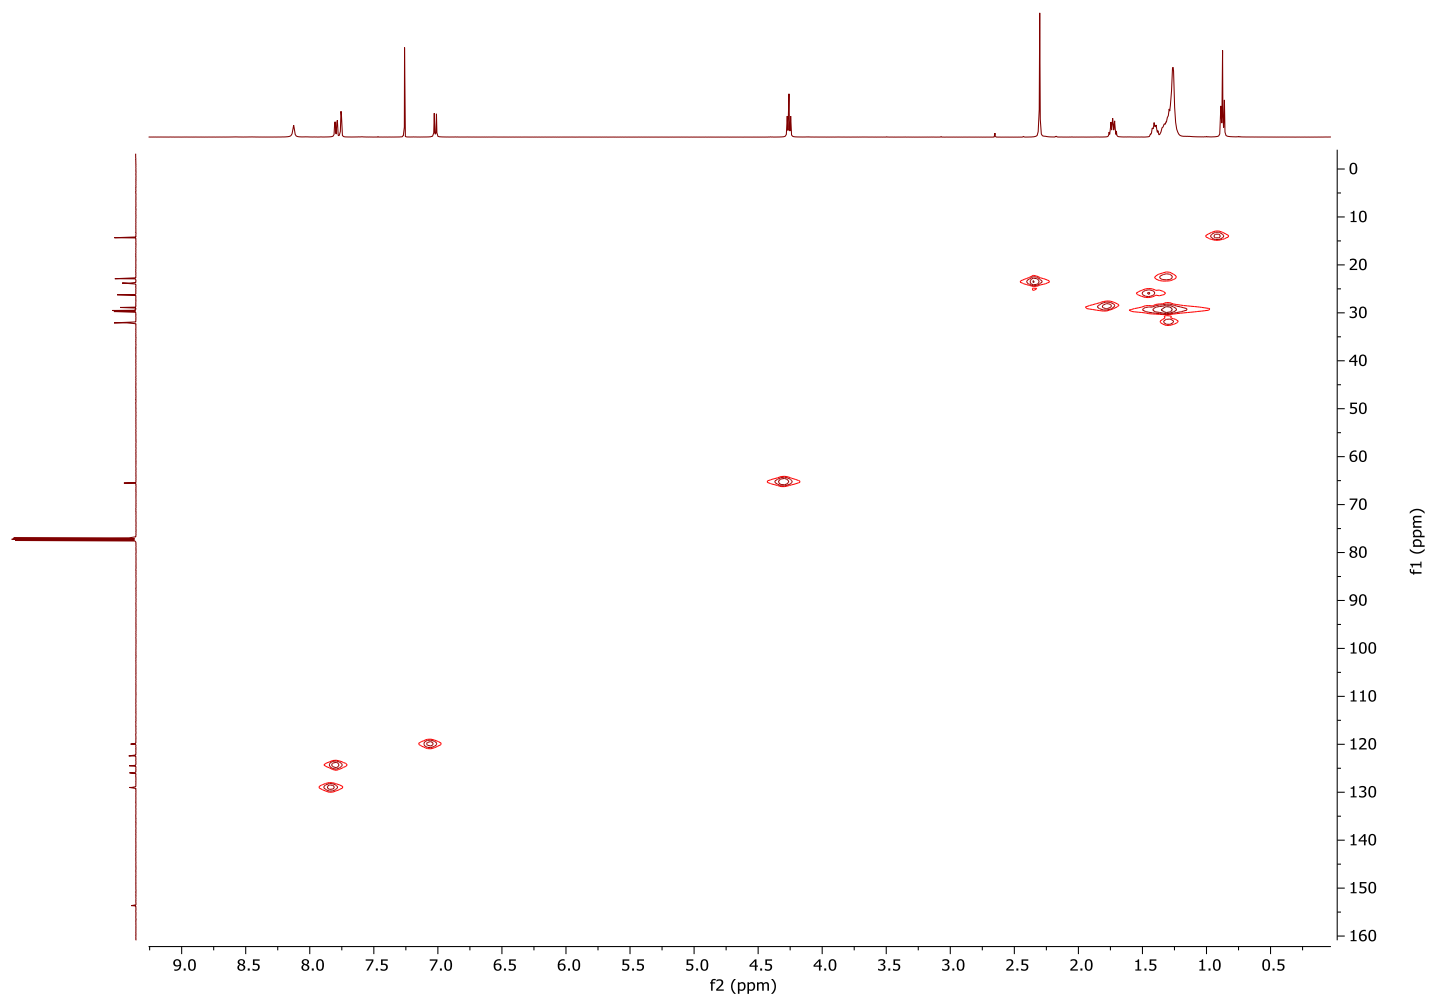

**Figure S5.** gHMBC spectrum of bulbiferate A (**1**; 500 MHz, CDCl<sub>3</sub>)

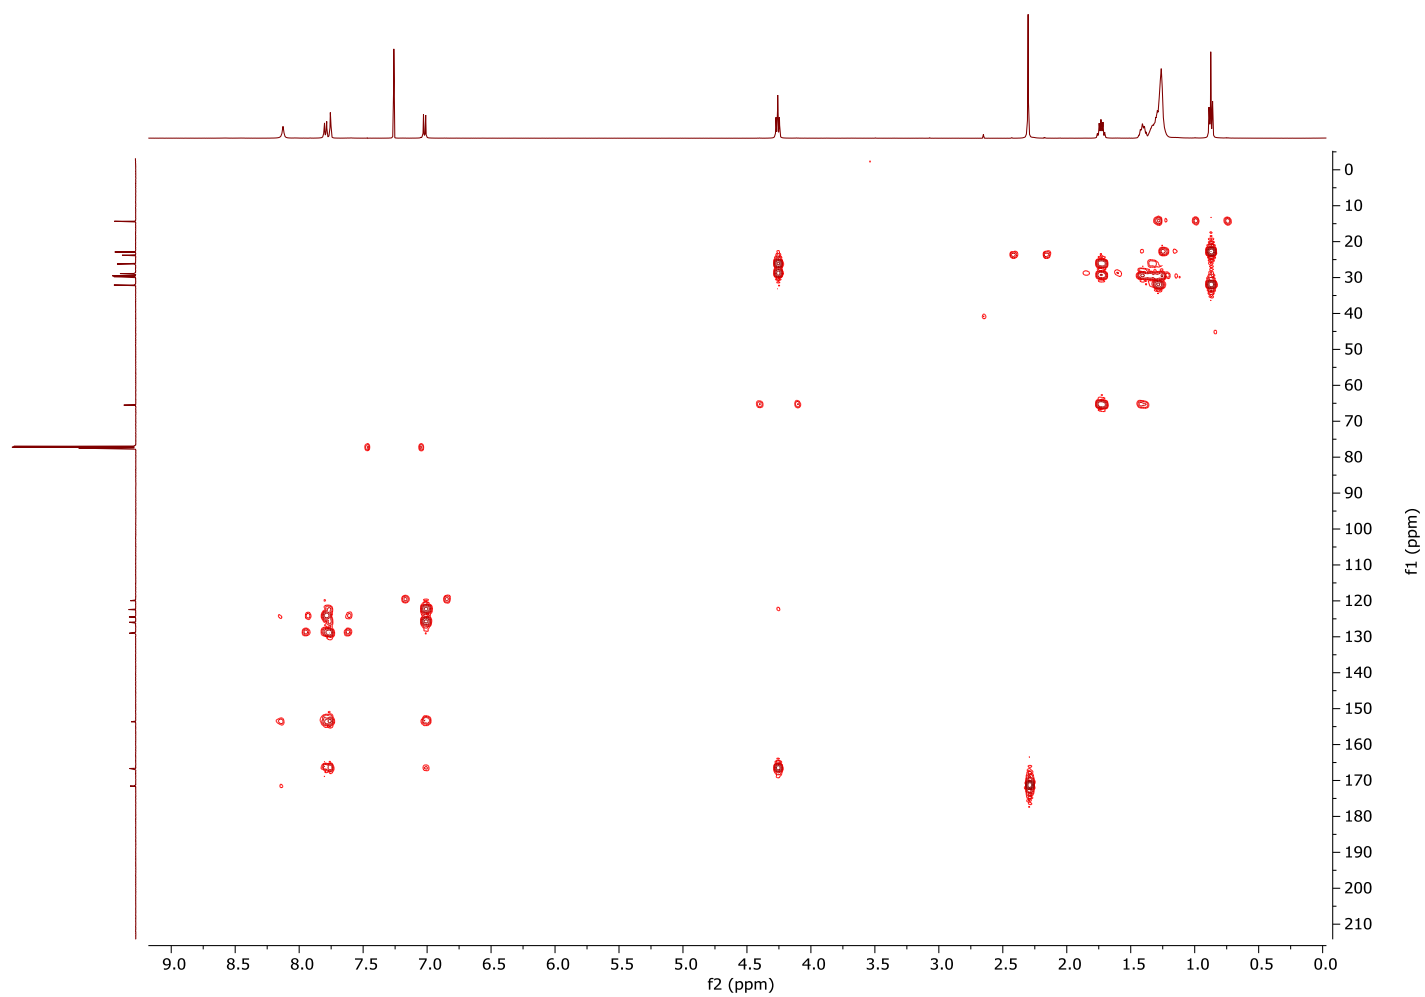

**Figure S6.**  $^1\text{H}$  NMR spectrum of bulbiferate B (**2**; 600 MHz,  $\text{CDCl}_3$ )

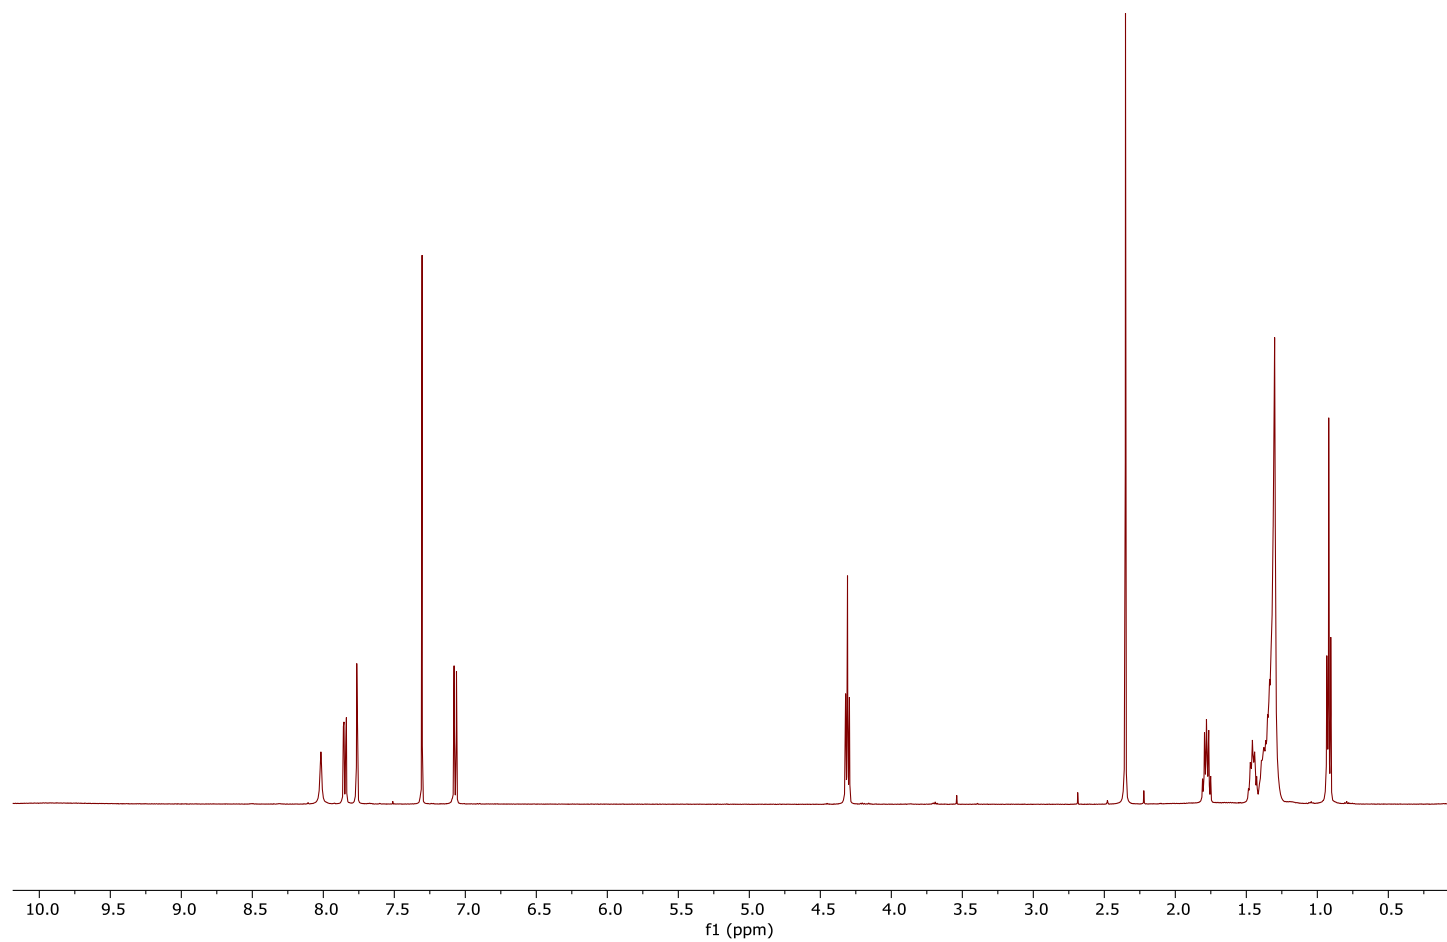



**Figure S7.**  $^{13}\text{C}$  NMR spectrum of bulbiferate B (**2**; 125 MHz,  $\text{CDCl}_3$ )

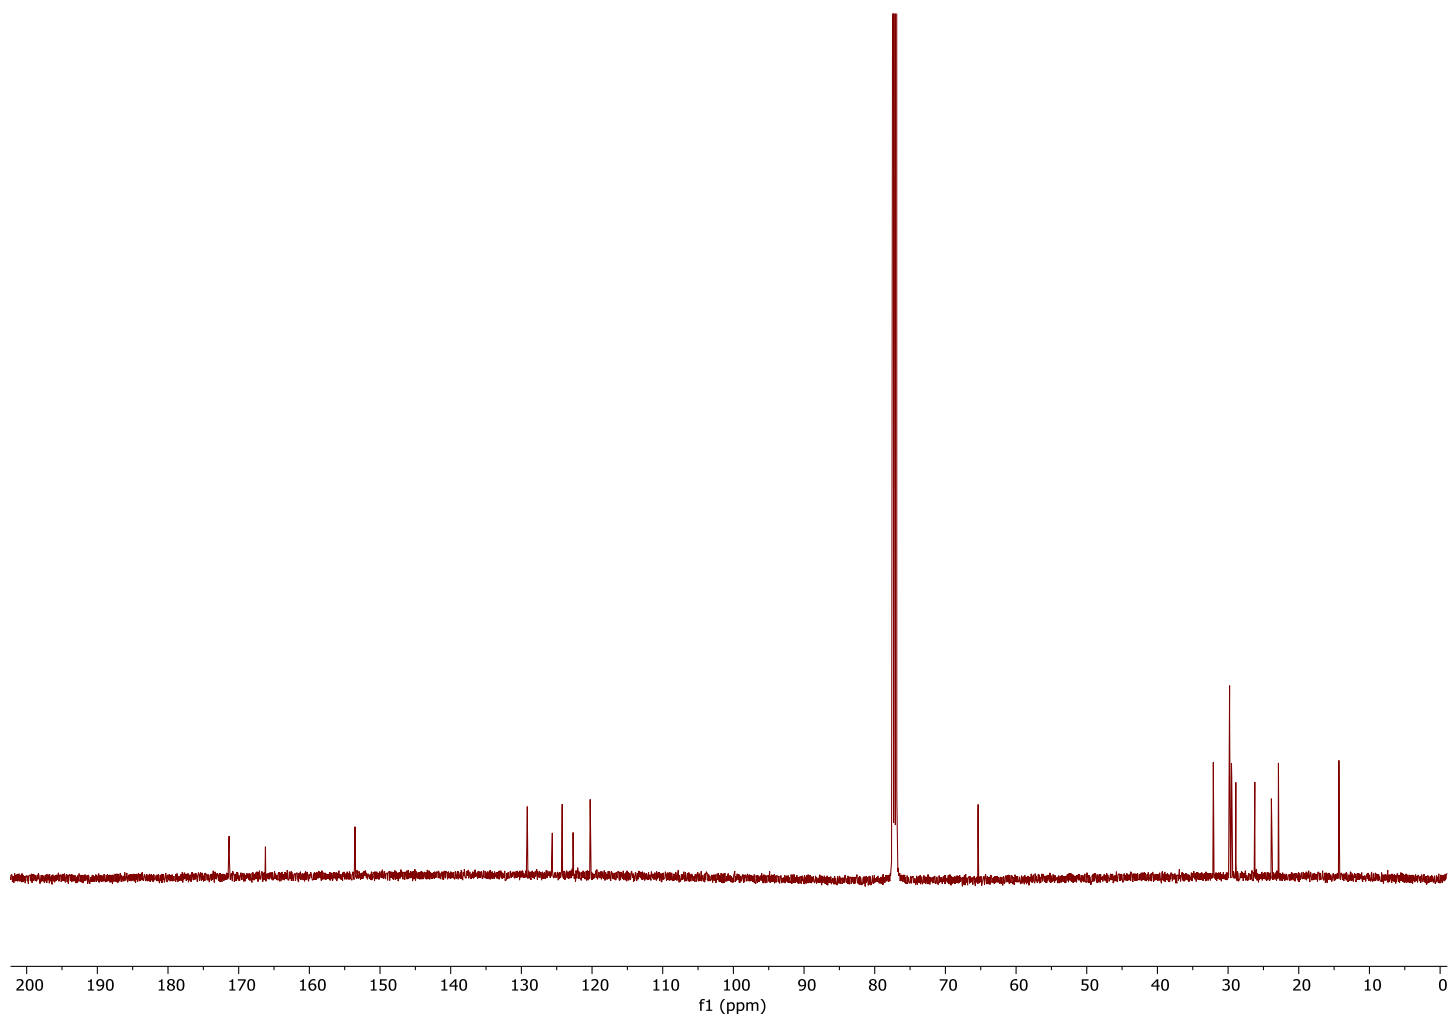

**Figure S8.** gCOSY spectrum of bulbiferate B (**2**; 500 MHz, CDCl<sub>3</sub>)

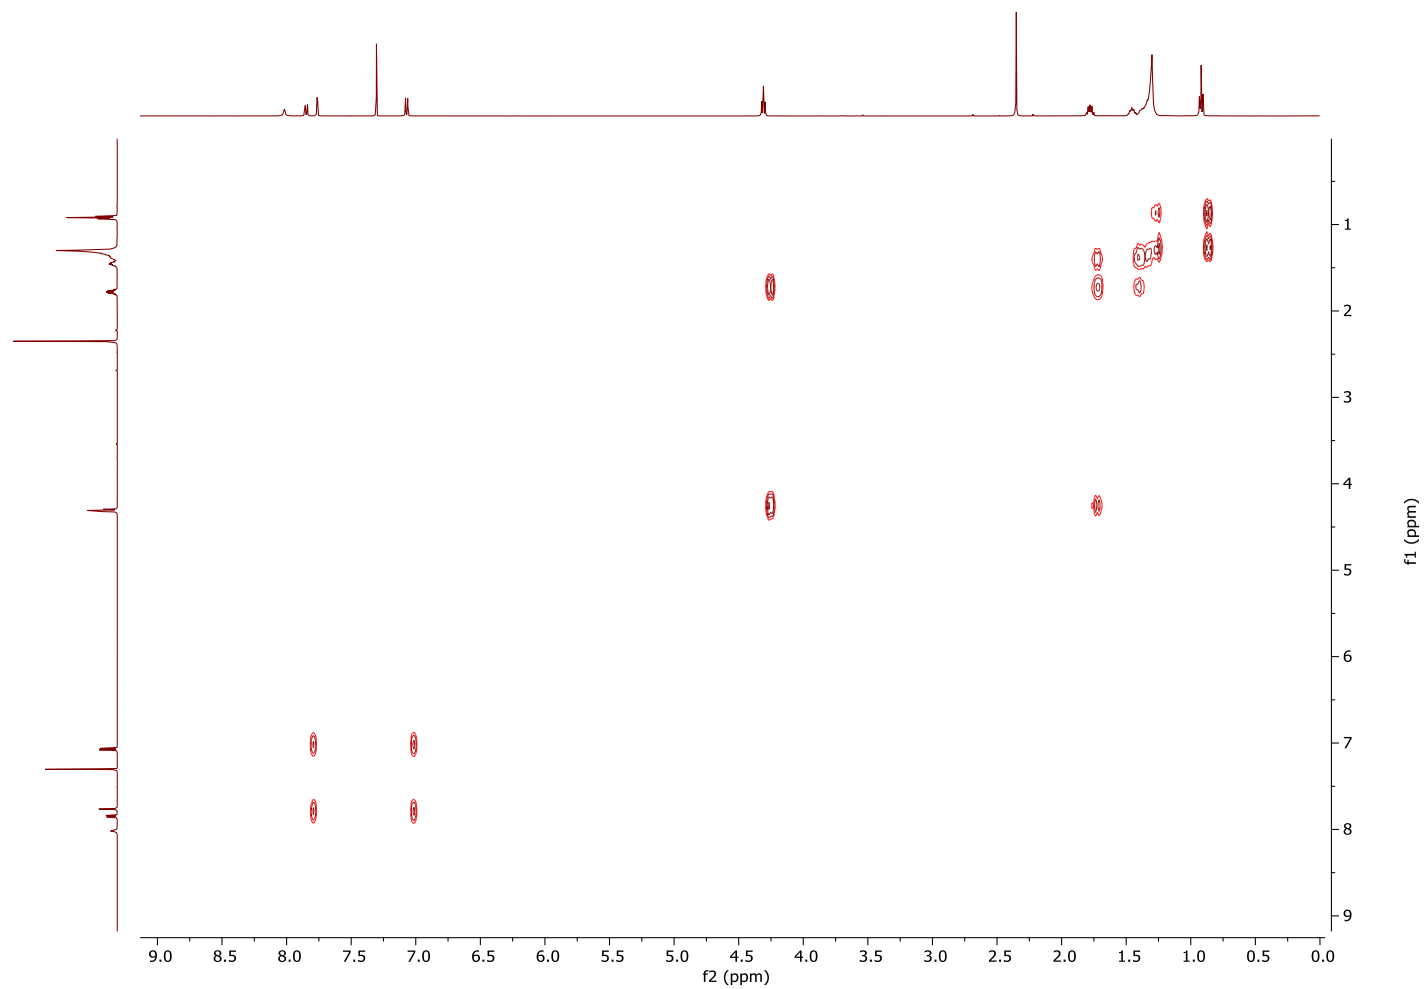

**Figure S9.** gHSQC spectrum of bulbiferate B (**2**; 500 MHz, CDCl<sub>3</sub>)

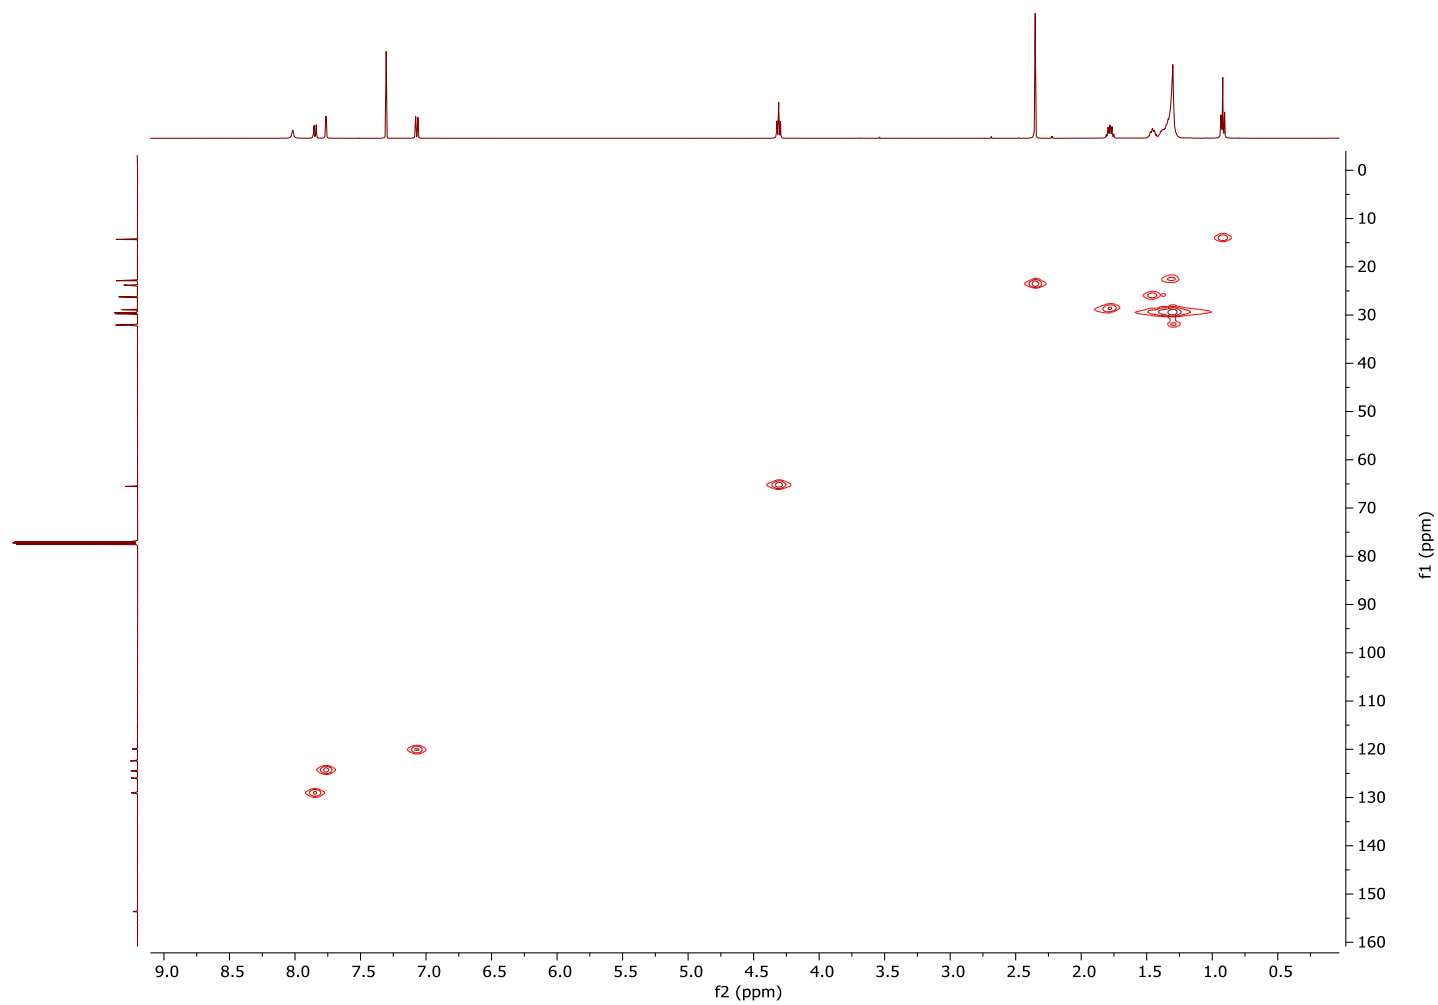

**Figure S10.** gHMBC spectrum of bulbiferate B (**2**; 500 MHz, CDCl<sub>3</sub>)

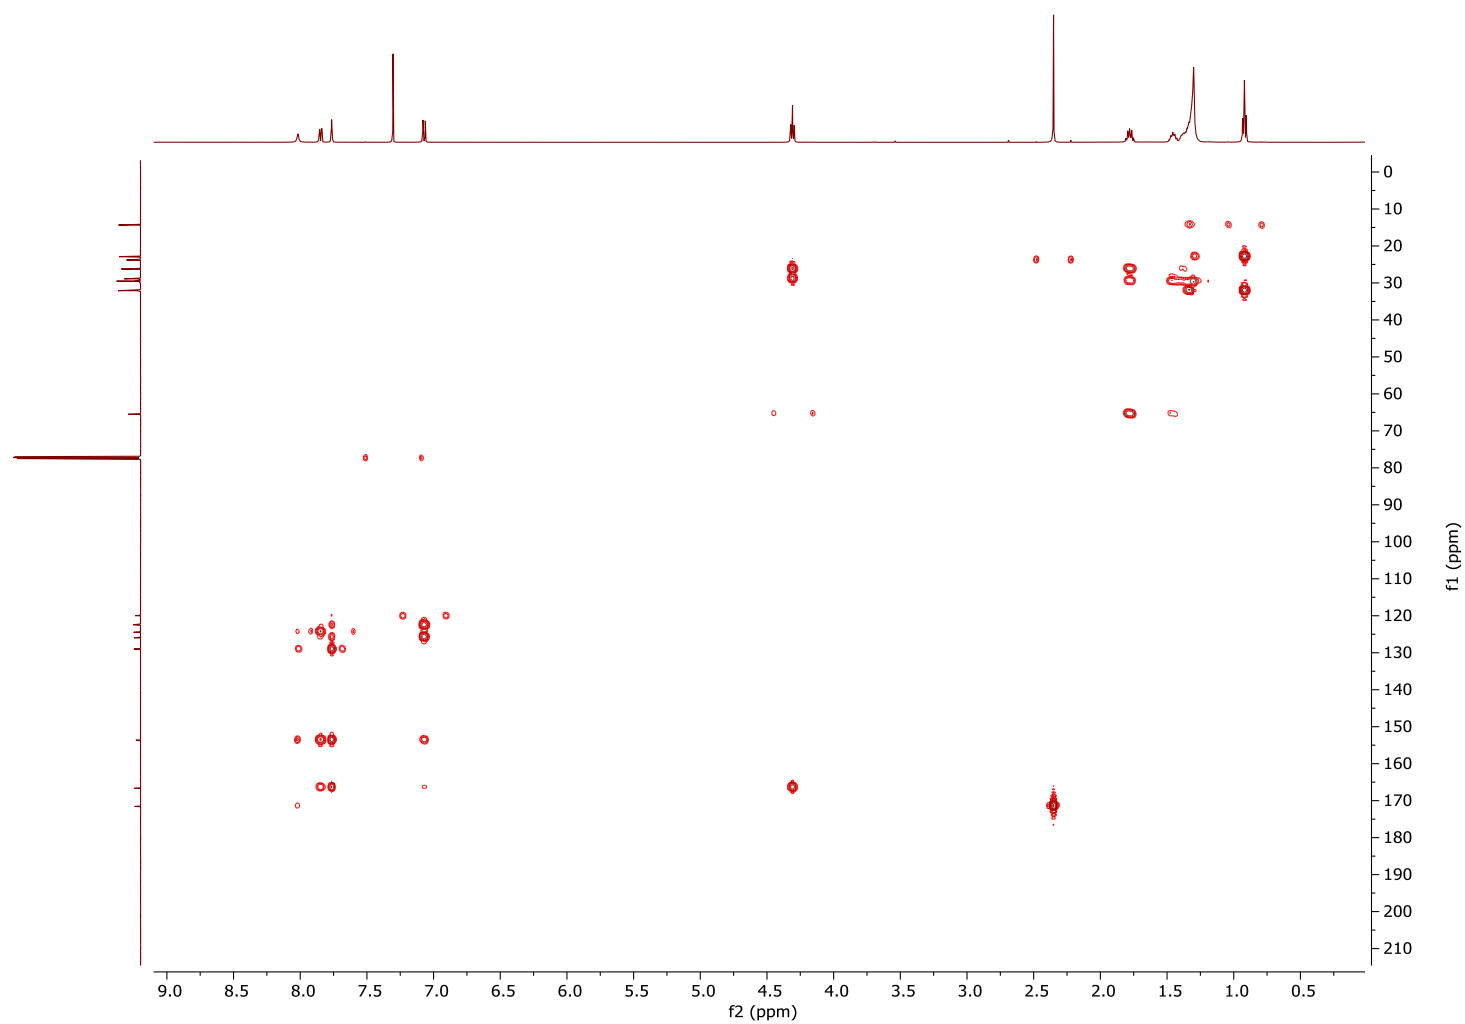

**Figure S11.**  $^1\text{H}$  NMR spectrum of compound **3** (500 MHz, methanol- $d_4$ )

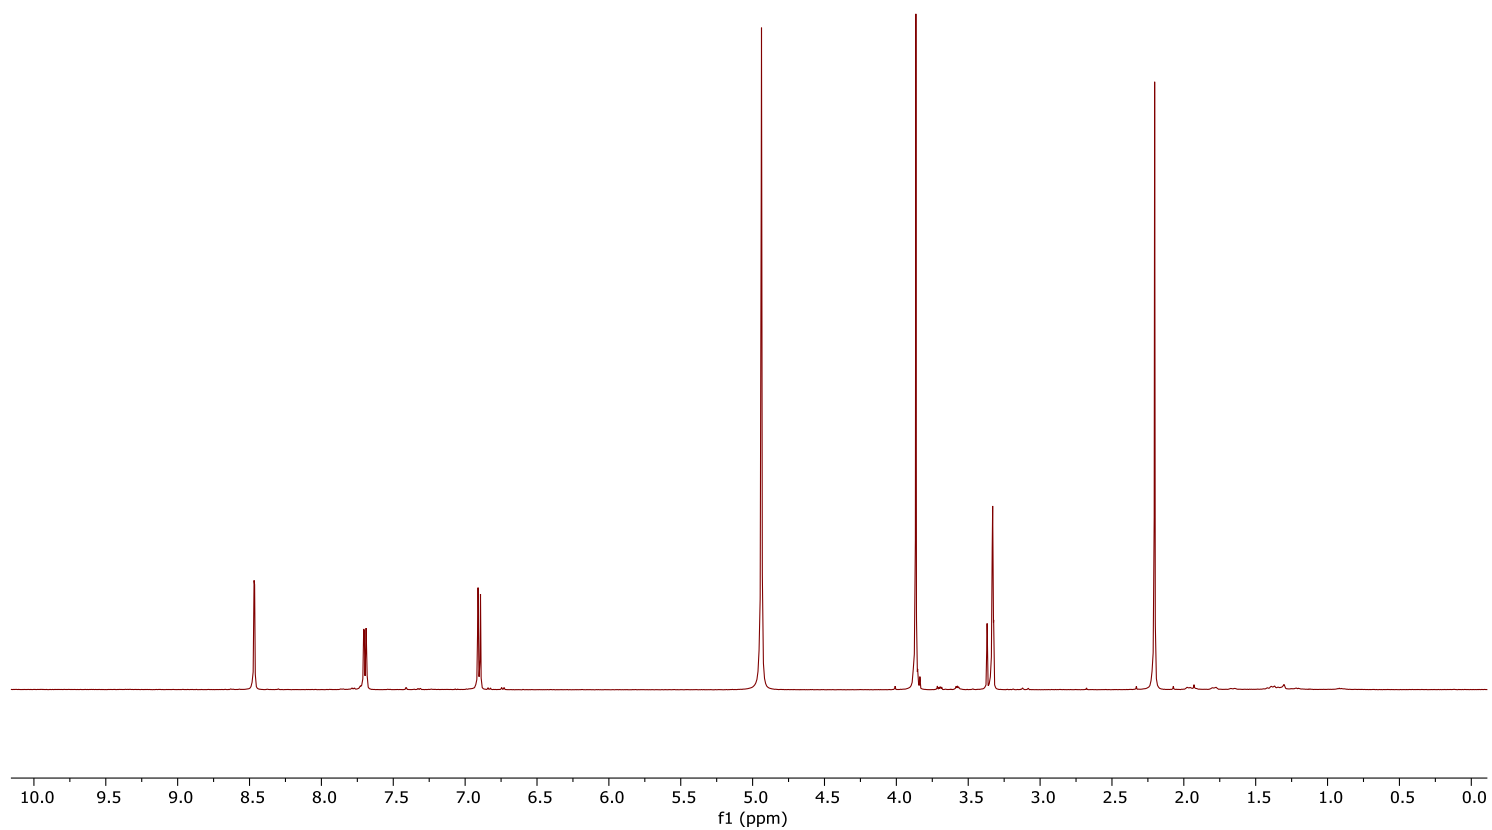

**Figure S12.**  $^{13}\text{C}$  NMR spectrum of compound **3** (125 MHz, methanol- $d_4$ )

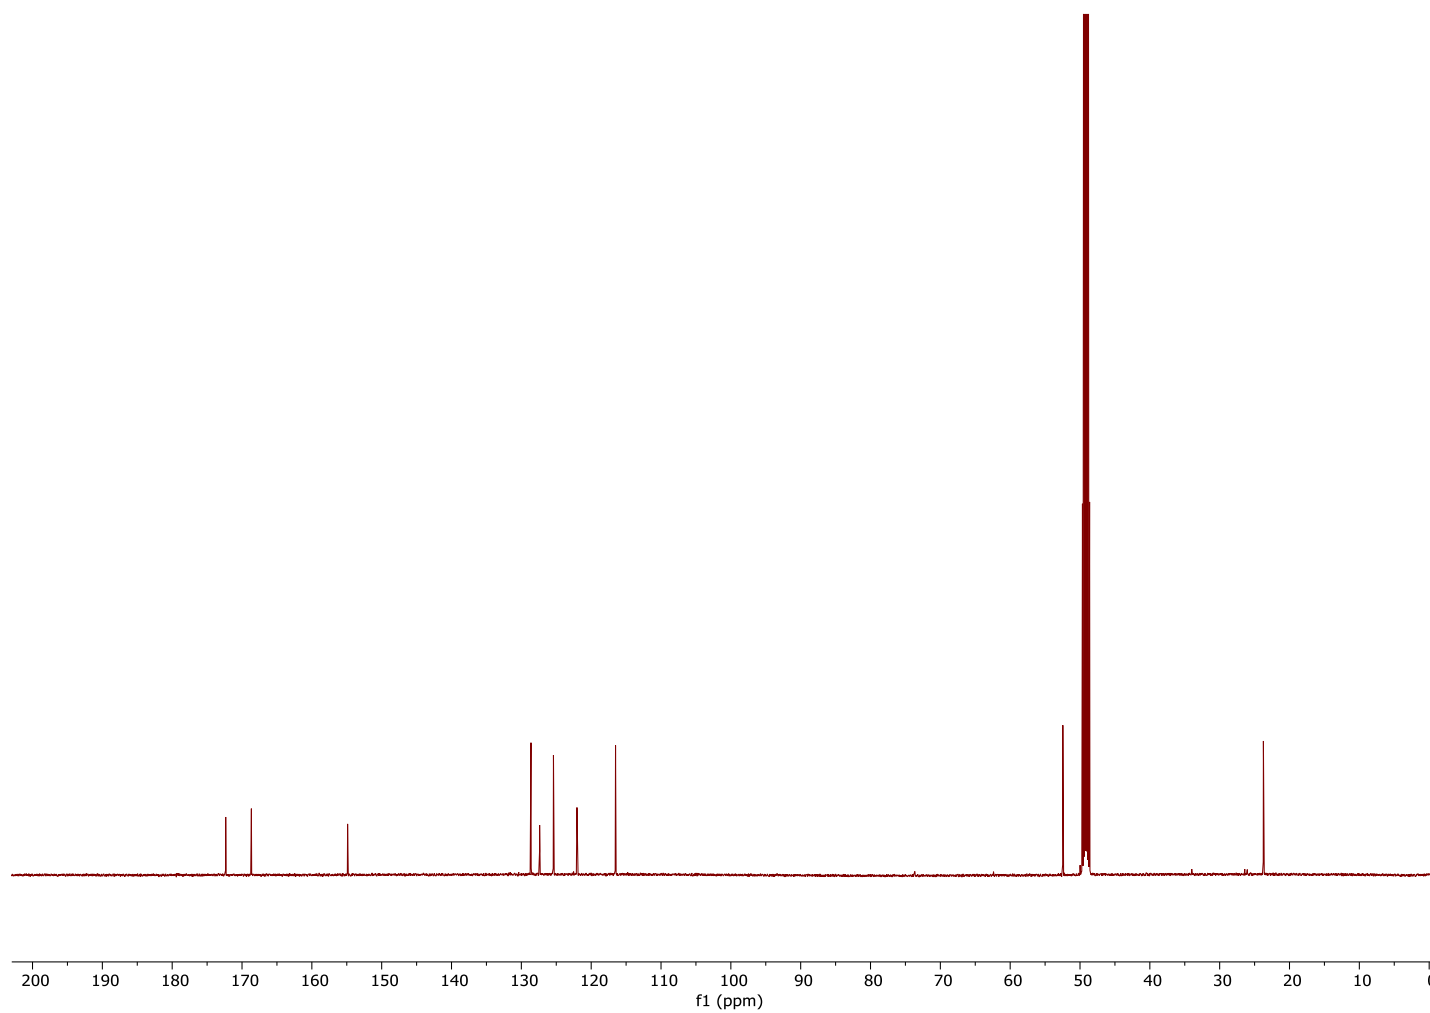

**Figure S13.**  $^1\text{H}$  NMR spectrum of compound **4** (500 MHz, methanol- $d_4$ )

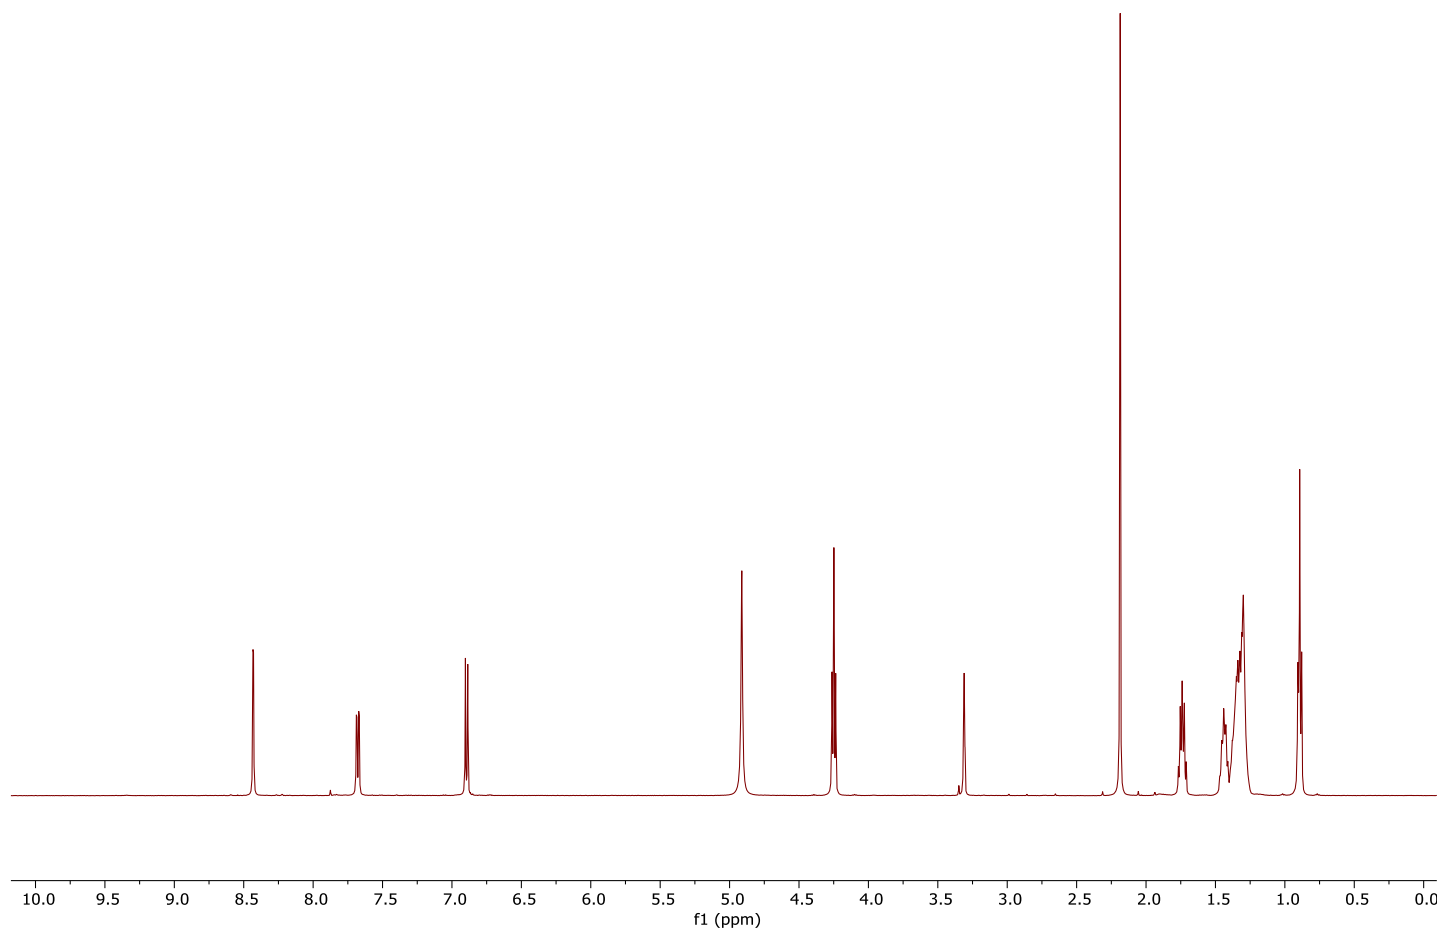

**Figure S14.**  $^{13}\text{C}$  NMR spectrum of compound **4** (125 MHz, methanol- $d_4$ )

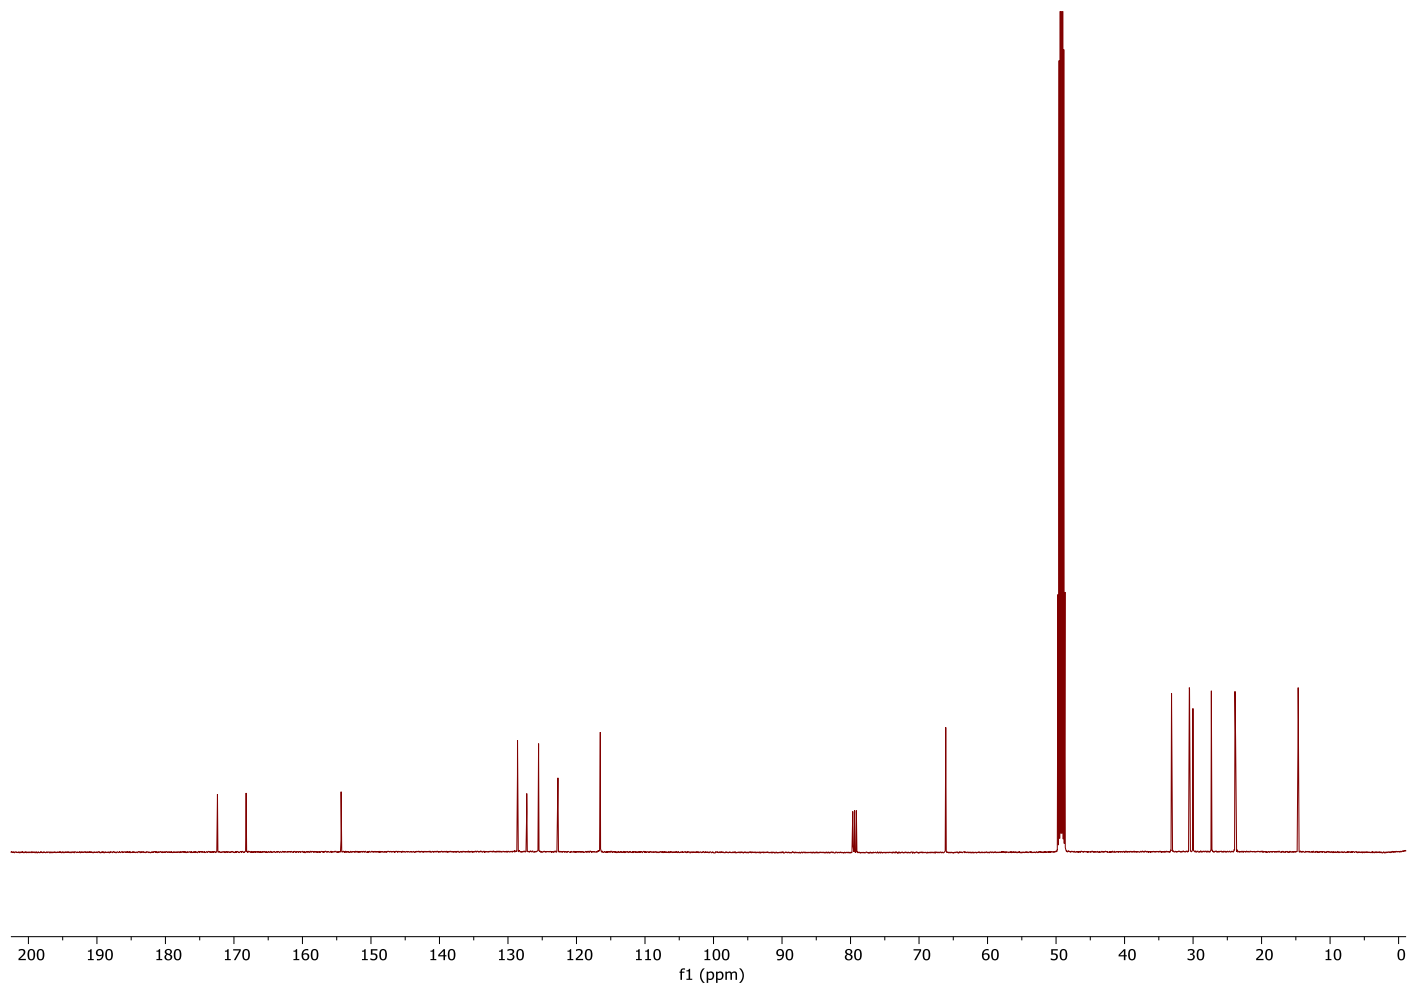



**Figure S15.**  $^1\text{H}$  NMR spectrum of compound **5** (500 MHz,  $\text{CDCl}_3$ )

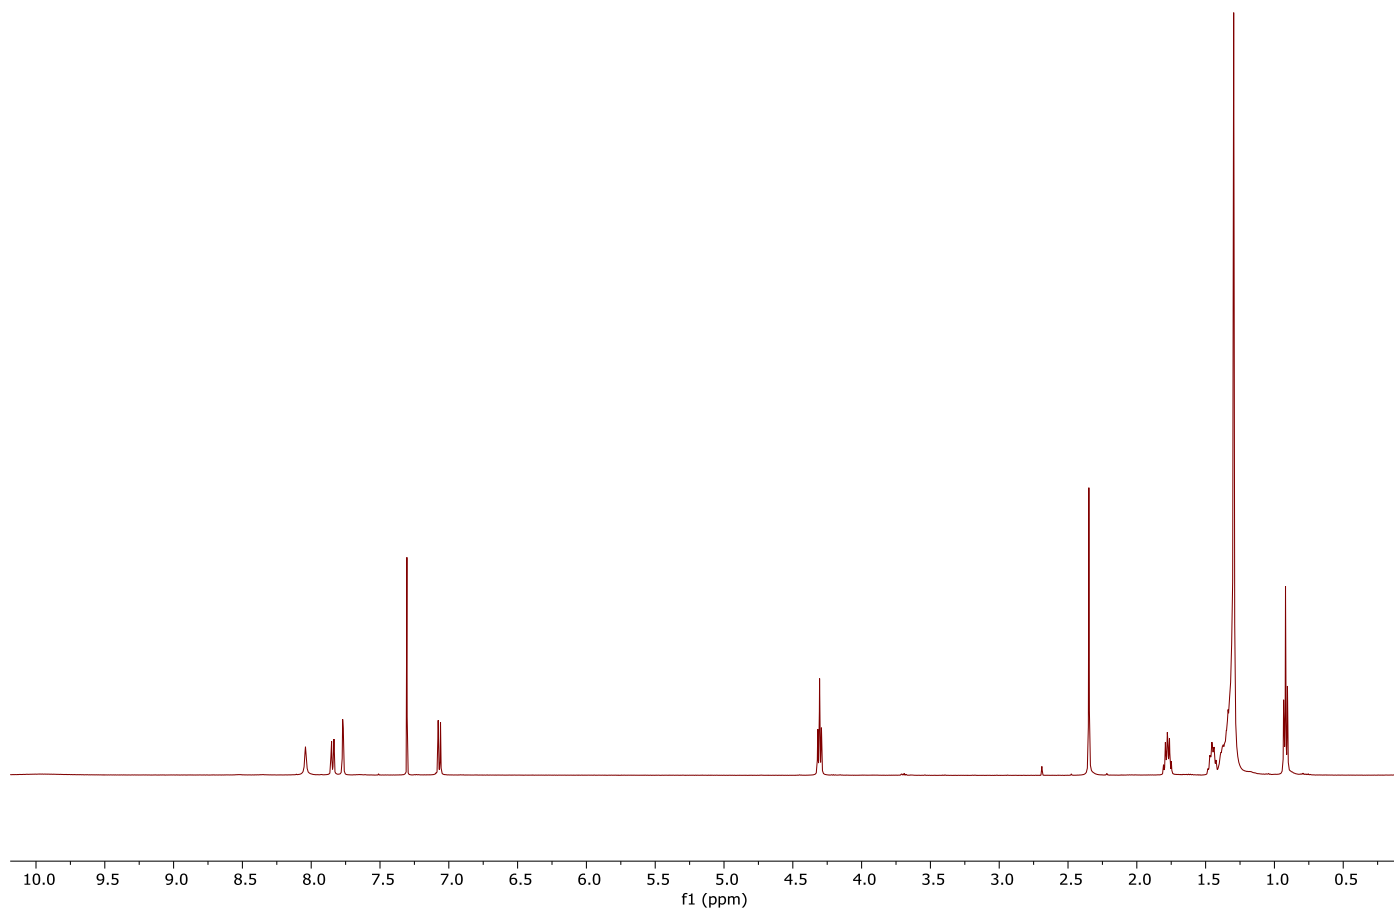

**Figure S16.**  $^{13}\text{C}$  NMR spectrum of compound **5** (125 MHz,  $\text{CDCl}_3$ )

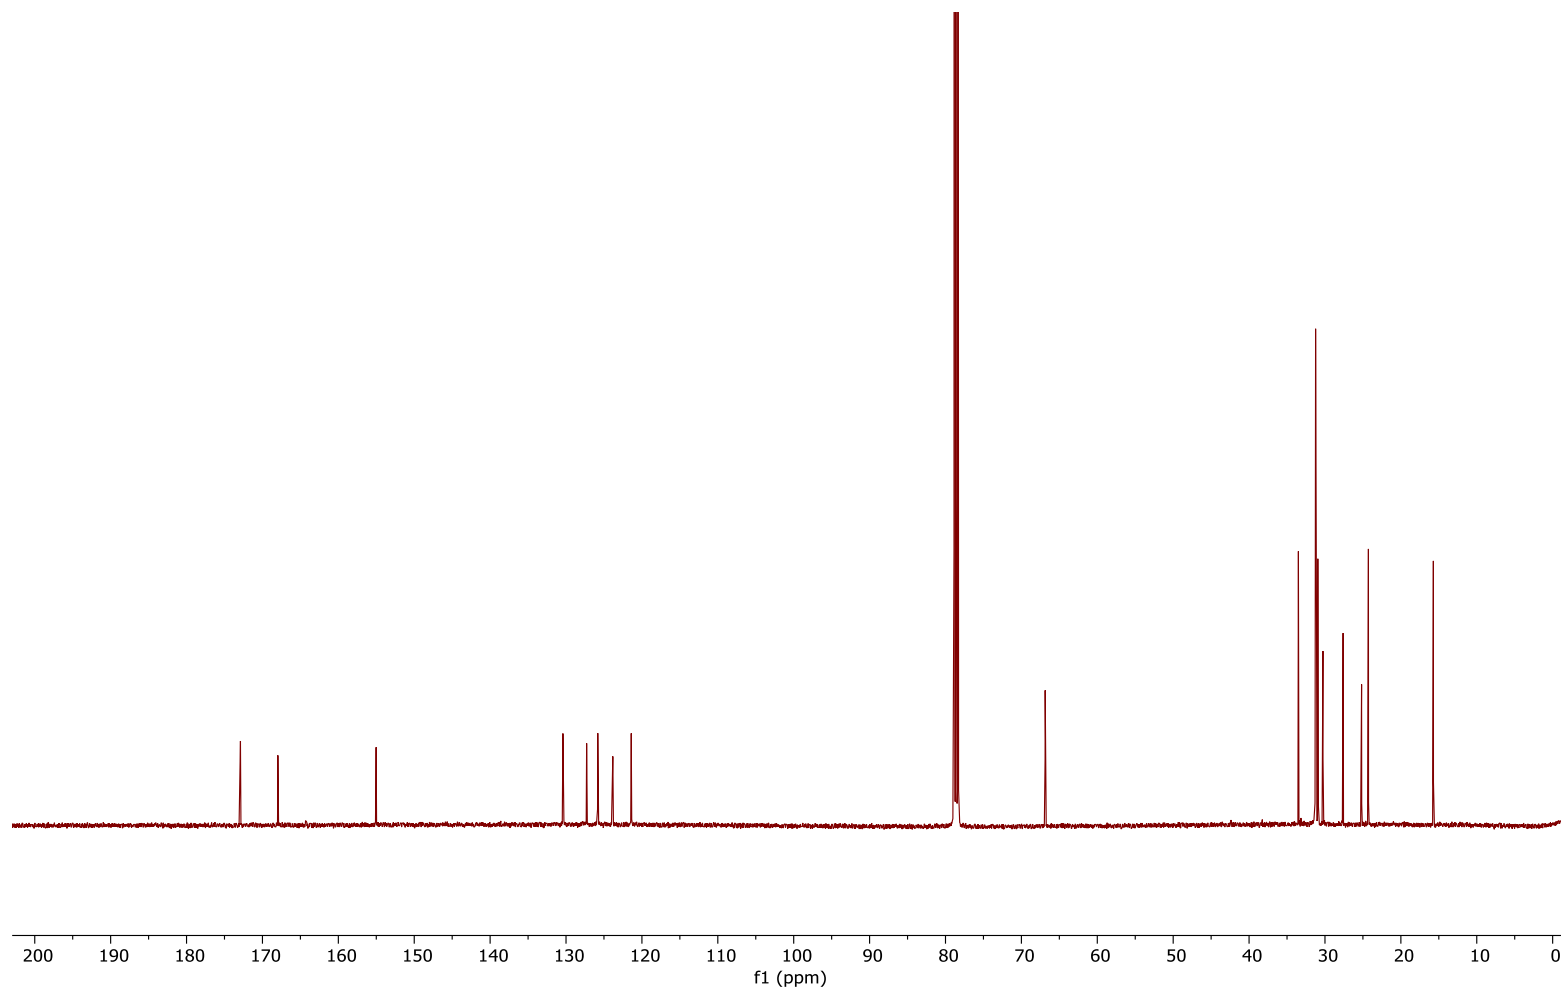

**Figure S17.** ESI-MS spectrum of 4', 5'-didehydro-5'-deoxyinosine

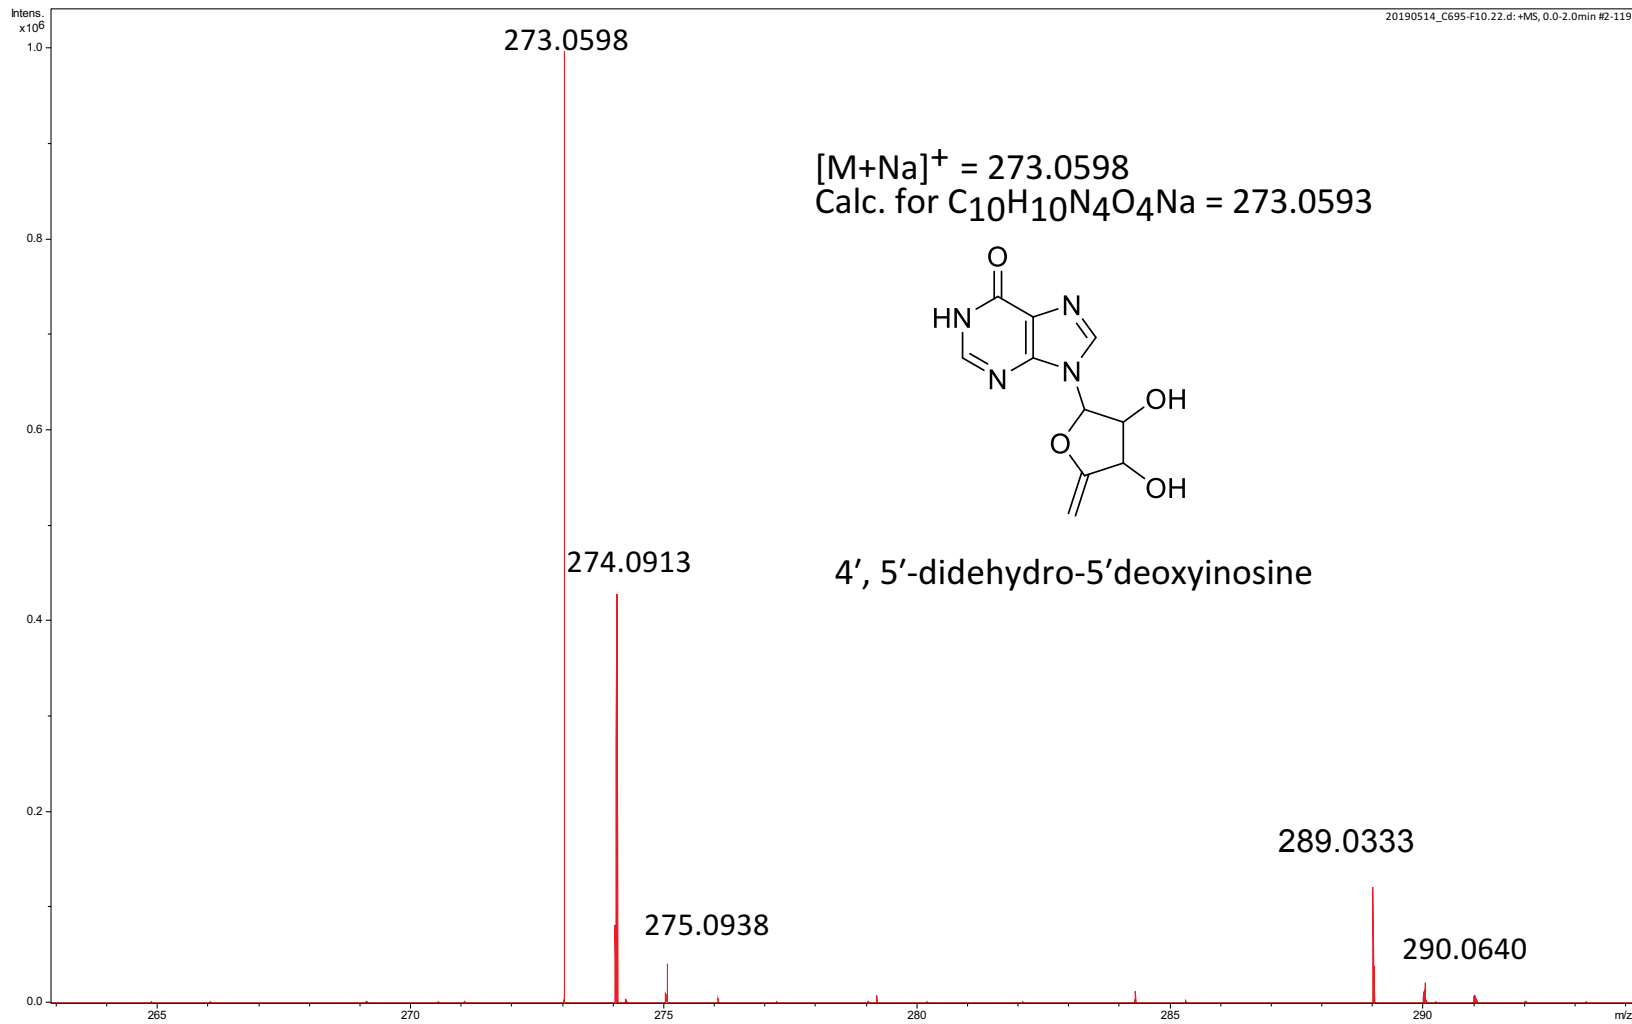

**Figure S18.** ESI-MS spectrum of 2'-O-methyladenosine

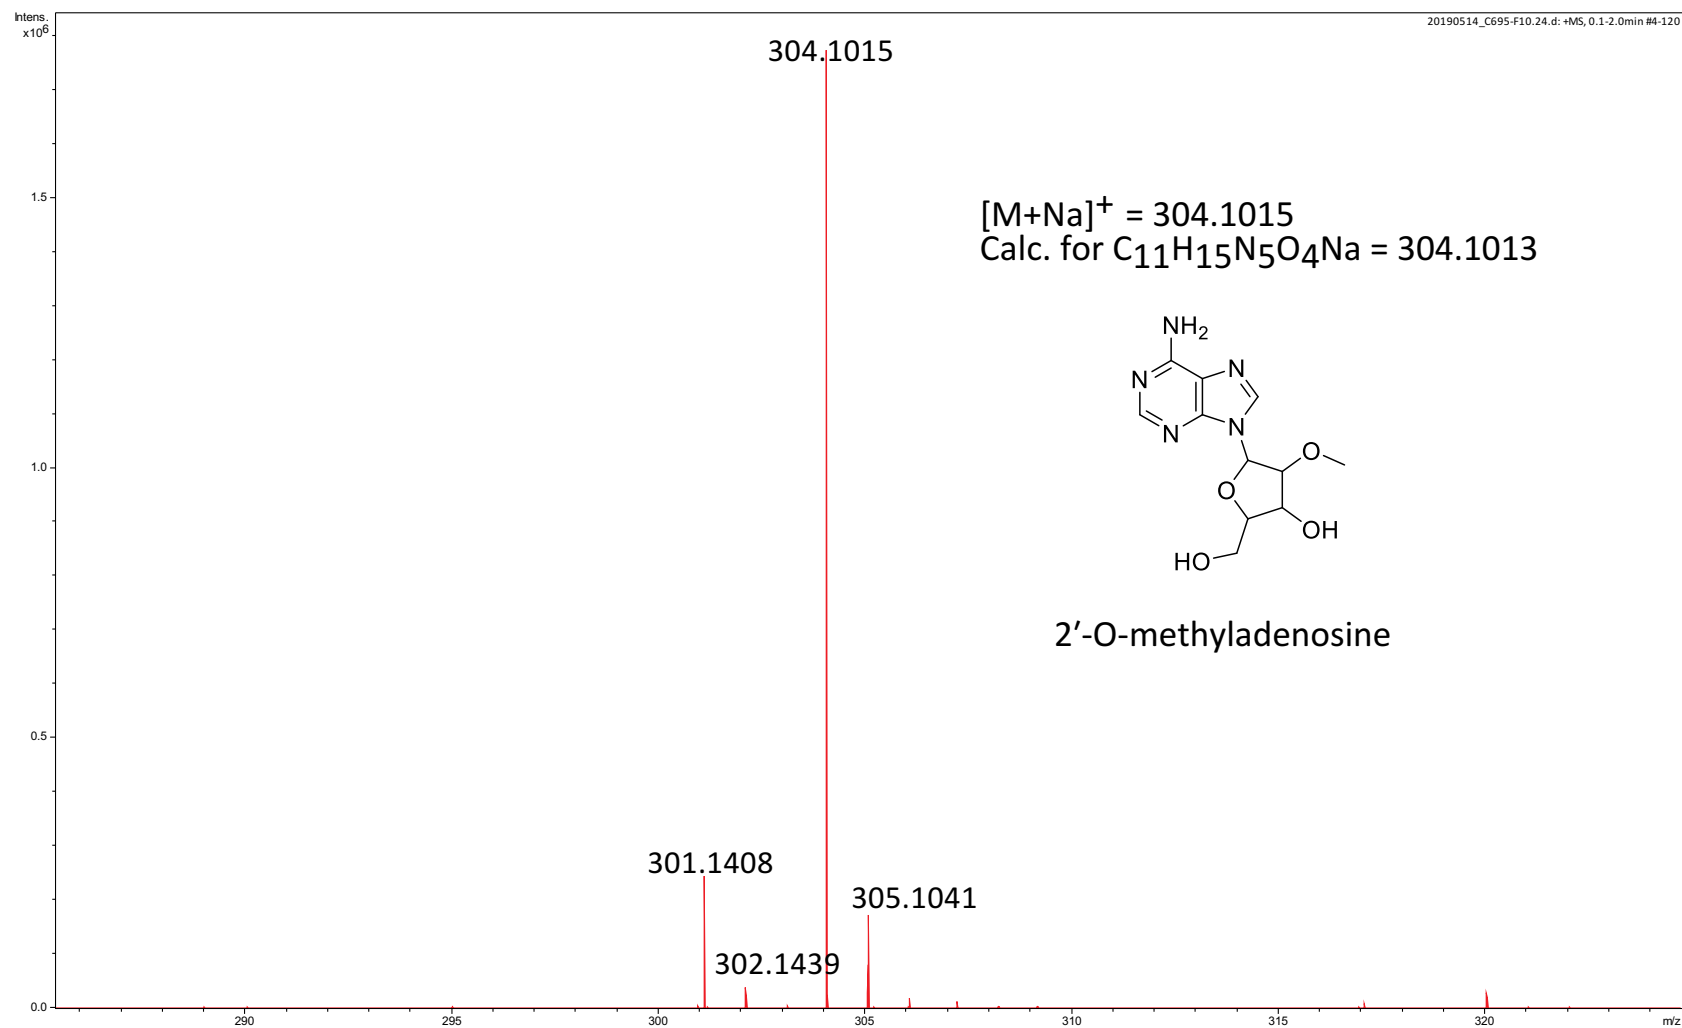

**Figure S19.** ESI-MS spectrum of 5'-methylthioadenosine

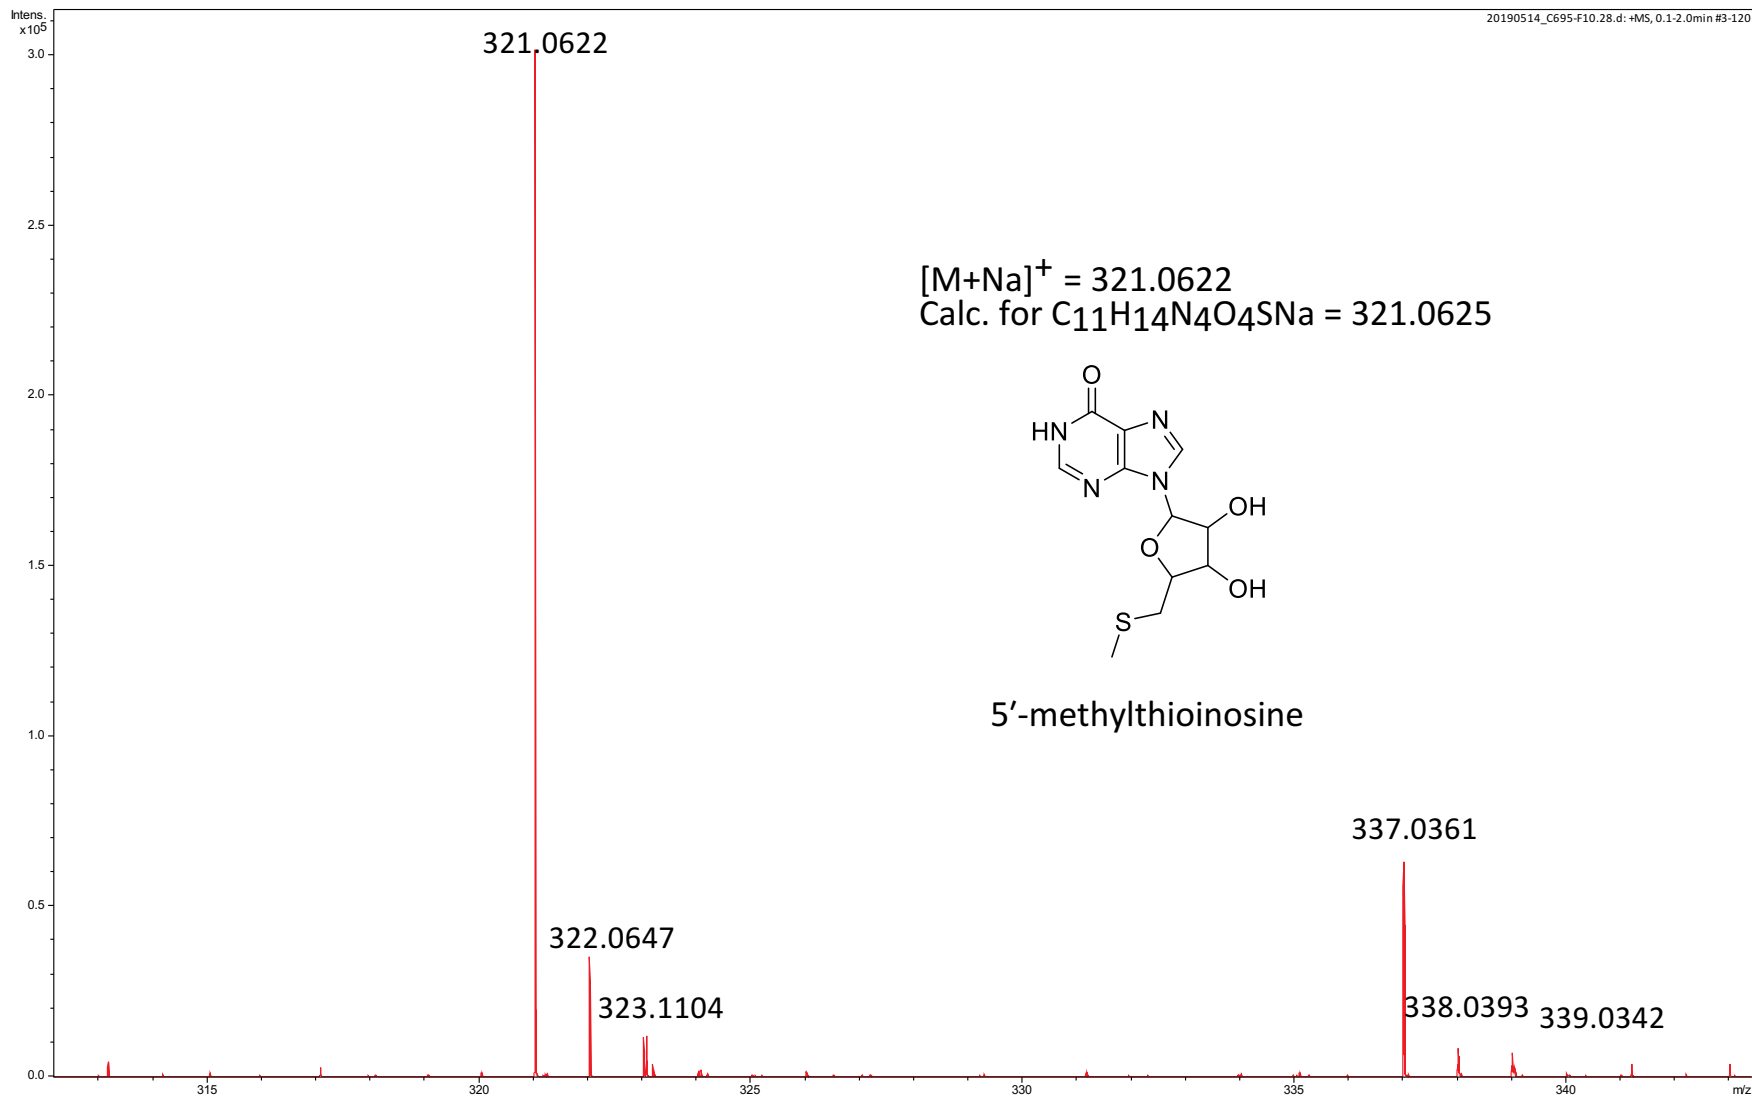

**Figure S20.**  $^1\text{H}$  NMR spectrum of 4', 5'-dideohydro-5'-deoxyinosine (400 MHz,  $\text{CD}_3\text{OD}$ )

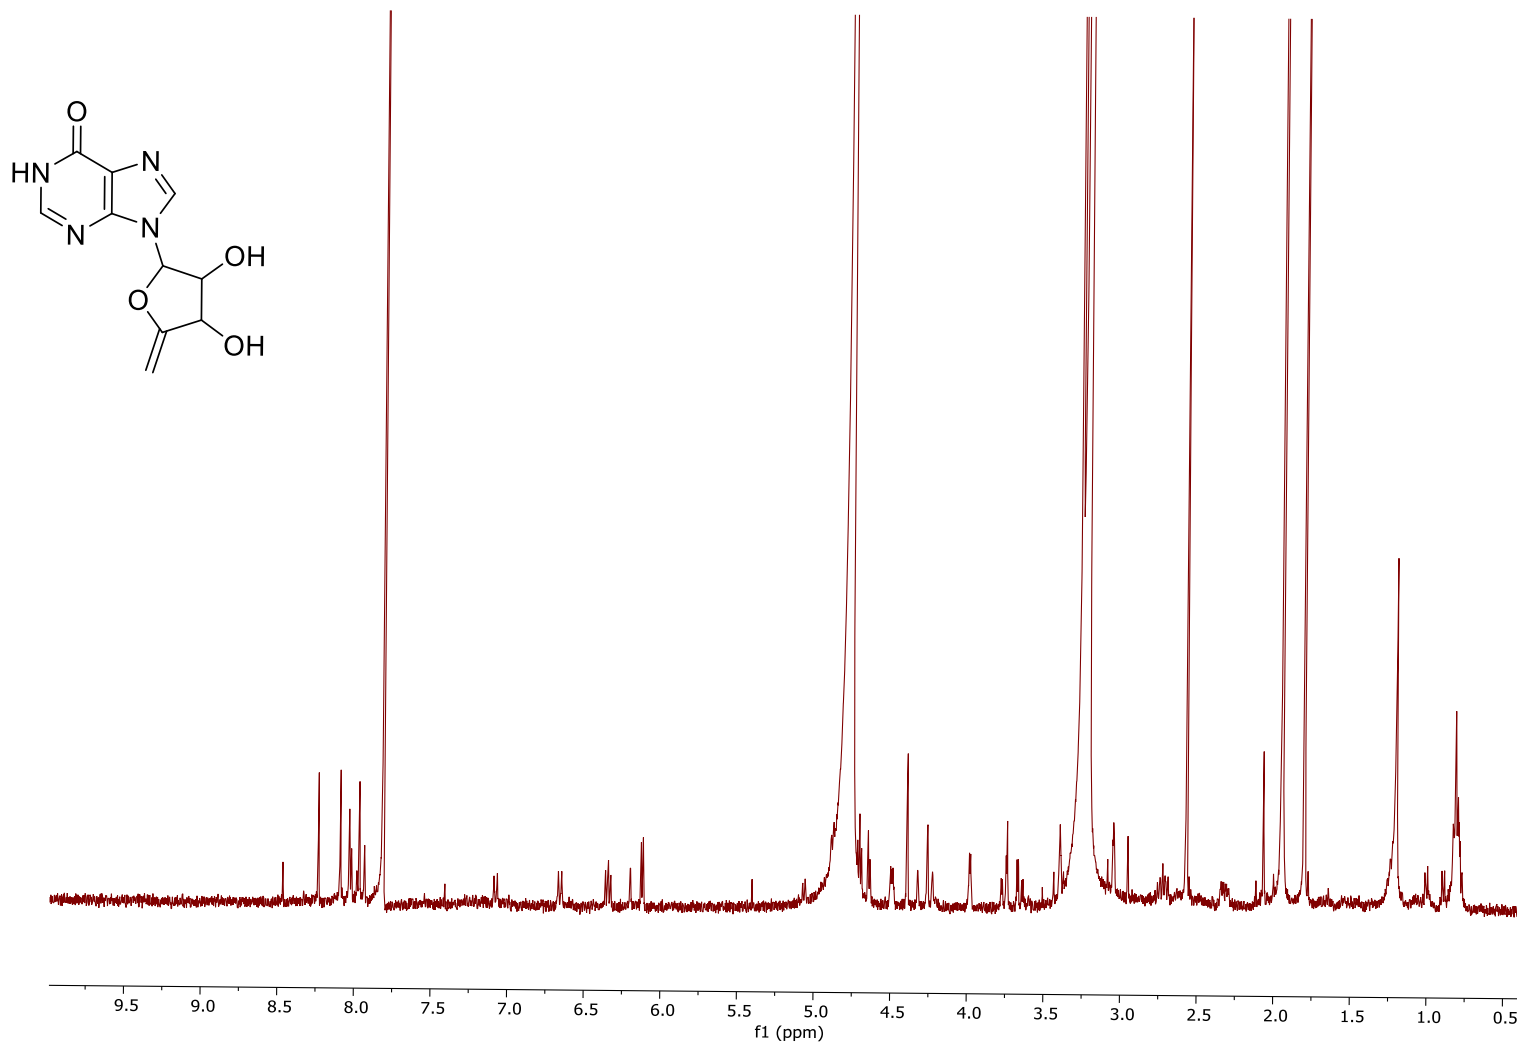

**Figure S21.**  $^1\text{H}$  NMR spectrum of 2'-O-methyladenosine (400 MHz,  $\text{CD}_3\text{OD}$ )

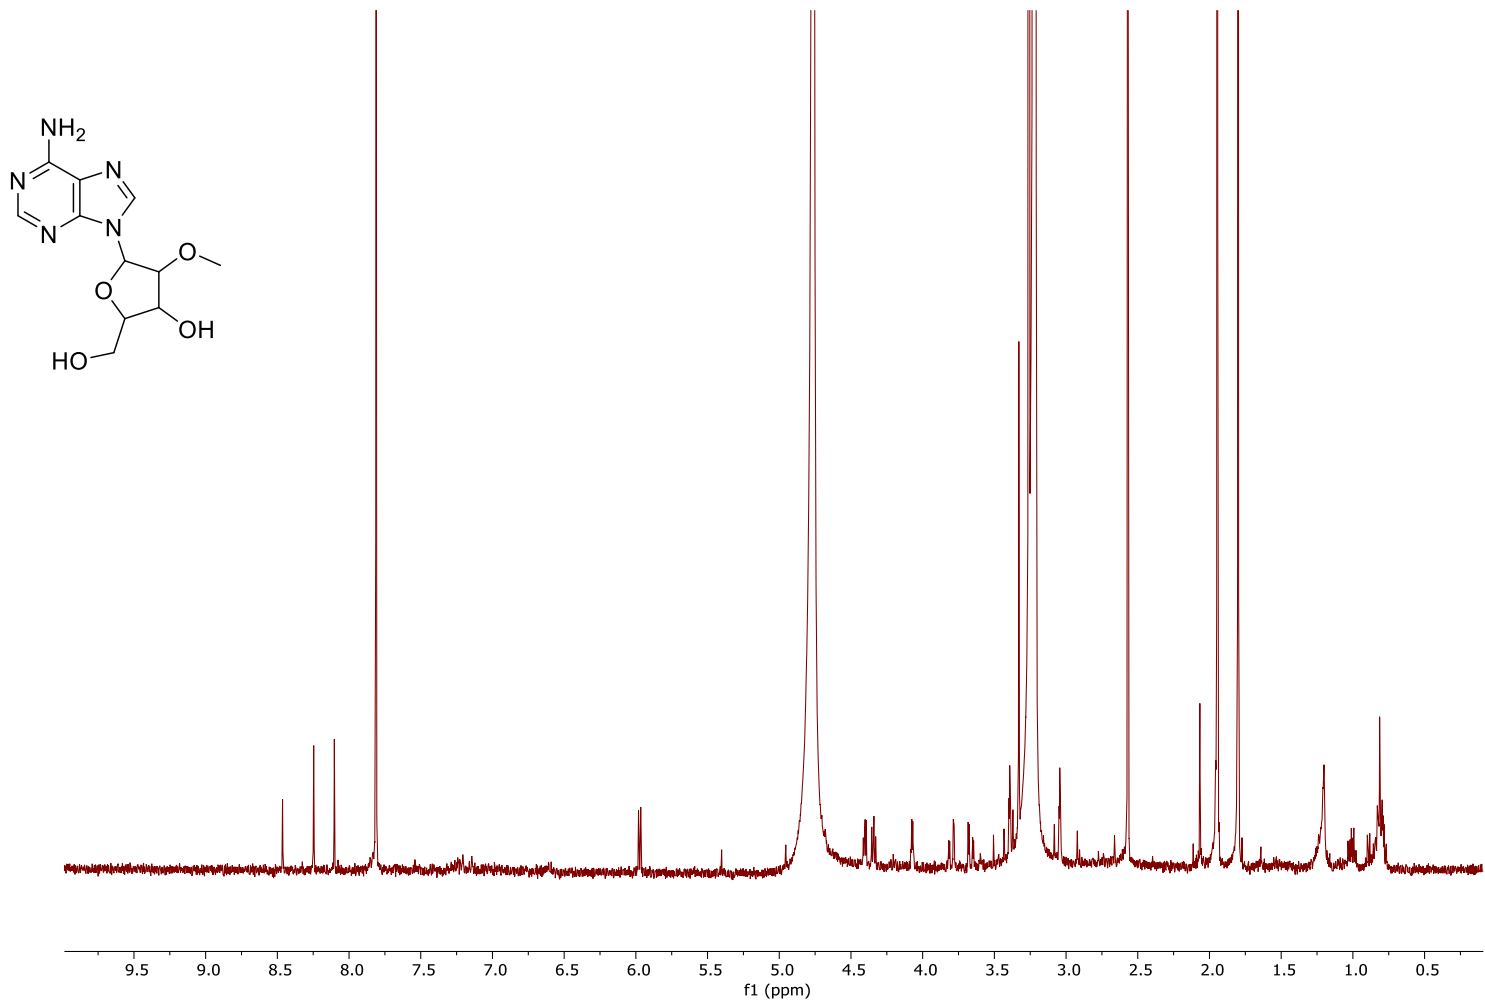

**Figure S22.**  $^1\text{H}$  NMR spectrum of 5'-methylthioadenosine (400 MHz,  $\text{CD}_3\text{OD}$ )

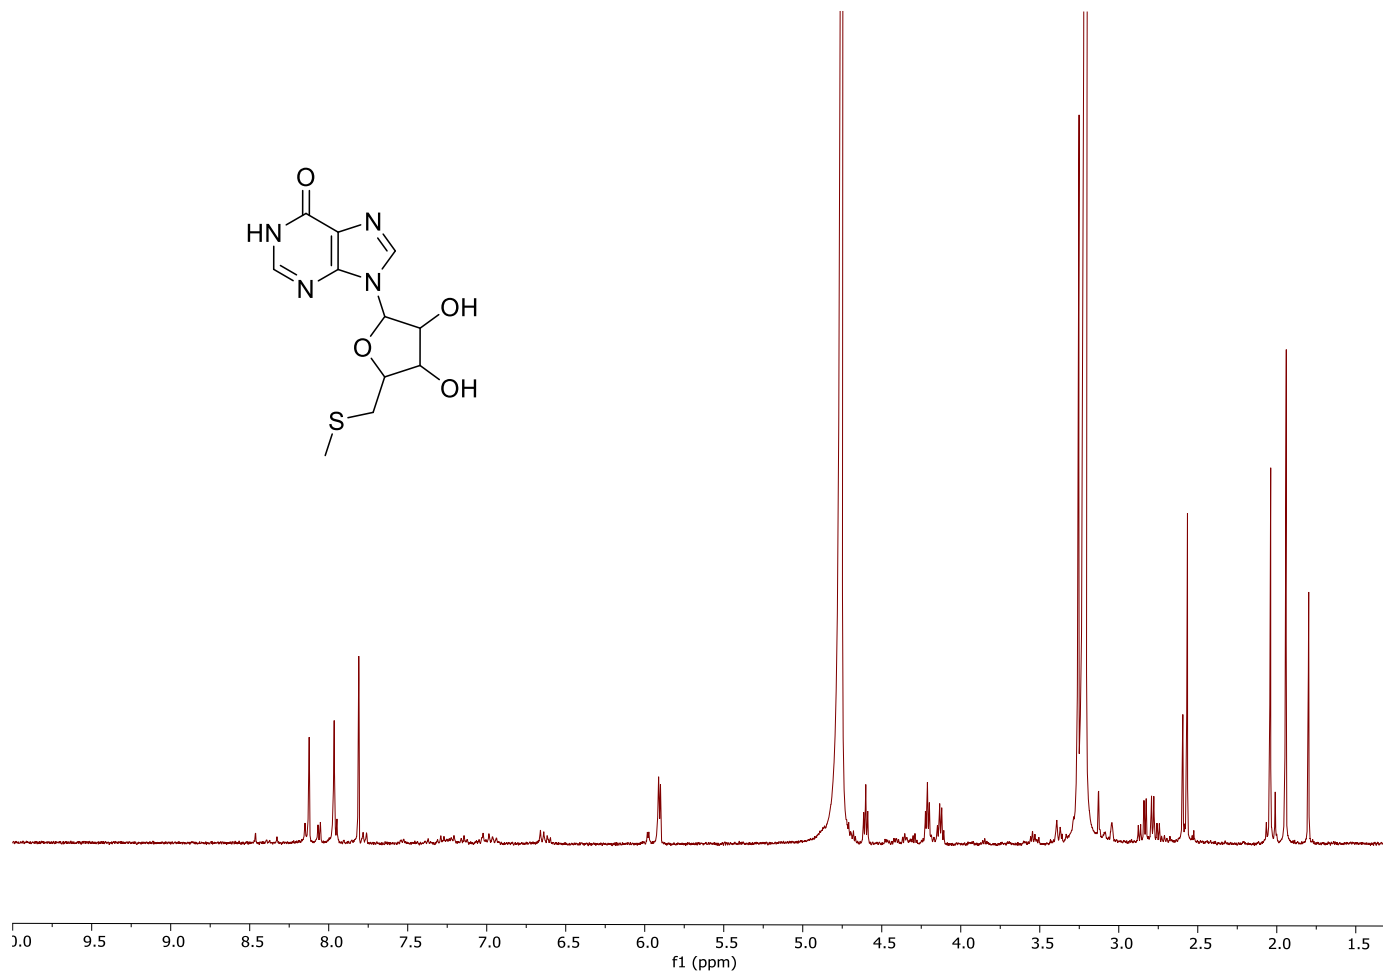

Supplement: NIHMS1042383-supplement-Supporting_Information.pdf [file NIHMS1042383-supplement-Supporting_Information.pdf]
